# Supplementary material for: The Burden of Mortality Attributable to Diabetes
Source: Oxford University Press journal article supplement (doi:10.2337/diacare.28.9.2130), 2005-09-01
Supplement: 2130-sup-dc0100onlineappendix.doc [file 2130-sup-dc0100onlineappendix.doc]

**Online Appendix 1. WHO member states and classification in WHO Regions**

| **AFR D** |  | **AFR E** |  | **AMR B** |  | **AMR D** |
| --- | --- | --- | --- | --- | --- | --- |
| Algeria |  | Botswana |  | Antigua and Barbuda |  | Bolivia |
| Angola |  | Burundi |  | Argentina |  | Ecuador |
| Benin |  | Central African Republic |  | Bahamas |  | Guatemala |
| Burkina Faso |  | Congo |  | Barbados |  | Haiti |
| Cameroon |  | Côte d'Ivoire |  | Belize |  | Nicaragua |
| Cape Verde |  | Democratic Republic of the Congo |  | Brazil |  | Peru |
| Chad |  | Eritrea |  | Chile |  |  |
| Comoros |  | Ethiopia |  | Colombia |  | **EMR B** |
| Djibouti |  | Kenya |  | Costa Rica |  | Bahrain |
| Equatorial Guinea |  | Lesotho |  | Cuba |  | Cyprus |
| Gabon |  | Malawi |  | Dominica |  | Iran (Islamic Republic of ) |
| Gambia |  | Mozambique |  | Dominican Republic |  | Jordan |
| Ghana |  | Namibia |  | El Salvador |  | Kuwait |
| Guinea |  | Rwanda |  | Grenada |  | Lebanon |
| Guinea-Bissau |  | South Africa |  | Guyana |  | Libyan Arab Jamahiriya |
| Liberia |  | Swaziland |  | Honduras |  | Oman |
| Madagascar |  | Uganda |  | Jamaica |  | Qatar |
| Mali |  | United Republic of Tanzania |  | Mexico |  | Saudi Arabia |
| Mauritania |  | Zambia |  | Panama |  | Syrian Arab Republic |
| Mauritius |  | Zimbabwe |  | Paraguay |  | Tunisia |
| Niger |  |  |  | Saint Kitts and Nevis |  | United Arab Emirates |
| Nigeria |  | **AMR A** |  | Saint Lucia |  |  |
| Sao Tome and Principe |  | Canada |  | Saint Vincent and the Grenadines |  | **EMR D** |
| Senegal |  | United States of America |  | Suriname |  | Egypt |
| Seychelles |  |  |  | Trinidad and Tobago |  | Iraq |
| Sierra Leone |  |  |  | Uruguay |  | Morocco |
| Somalia |  |  |  | Venezuela (Bolivarian Republic of) |  | Yemen |
| Sudan |  |  |  |  |  |  |
| Togo |  |  |  |  |  |  |

| **Online Appendix 1. WHO member states and classification in WHO Regions (continued)** |
| --- |
| | **EUR A** |  | **EUR B1** |  | **SEAR B** |  | **WPR B1** | | --- | --- | --- | --- | --- | --- | --- | | Andorra |  | Albania |  | Brunei Darussalam |  | China | | Austria |  | Bosnia and Herzegovina |  | Indonesia |  | Democratic People's Republic of Korea | | Belgium |  | Bulgaria |  | Malaysia |  | Mongolia | | Croatia |  | Georgia |  | Philippines |  | Republic of Korea | | Czech Republic |  | Poland |  | Singapore |  |  | | Denmark |  | Romania |  | Sri Lanka |  | **WPR B2** | | Finland |  | Slovakia |  | Thailand |  | Cambodia | | France |  | The former Yugoslav Republic of Macedonia |  |  |  | Lao People's Democratic Republic | | Germany |  | Turkey |  | **SEAR D** |  | Myanmar | | Greece |  | Serbia and Montenegro |  | Afghanistan |  | Viet Nam | | Iceland |  |  |  | Bangladesh |  |  | | Ireland |  | **EUR B2** |  | Bhutan |  | **WPR B3** | | Israel |  | Armenia |  | Democratic Republic of Timor-Leste |  | Cook Islands | | Italy |  | Azerbaijan |  | India |  | Fiji | | Luxembourg |  | Kyrgyzstan |  | Maldives |  | Kiribati | | Malta |  | Tajikistan |  | Nepal |  | Marshall Islands | | Monaco |  | Turkmenistan |  | Pakistan |  | Micronesia (Federated States of) | | Netherlands |  | Uzbekistan |  |  |  | Nauru | | Norway |  |  |  | **WPR A** |  | Niue | | Portugal |  | **EUR C** |  | Australia |  | Palau | | San Marino |  | Estonia |  | Japan |  | Papua New Guinea | | Slovenia |  | Hungary |  | New Zealand |  | Samoa | | Spain |  | Kazakhstan |  |  |  | Solomon Islands | | Sweden |  | Latvia |  |  |  | Tonga | | Switzerland |  | Lithuania |  |  |  | Tuvalu | | United Kingdom |  | Republic of Moldova |  |  |  | Vanuatu | |  |  | Russian Federation |  |  |  |  | |  |  | Ukraine |  |  |  |  | |
